# Supplementary material
Source: HighWire-hosted journal article supplement (https://bmjopenquality.bmj.com/content/13/1/e002475)
Supplement: inline-supplementary-material-2 [file inline-supplementary-material-2.pdf]

**Suppl Table 2** Patients with acute coronary syndromes, per year

| <b>Year</b> | <b>Patients (number)</b> |
|-------------|--------------------------|
| 2006        | 29,682                   |
| 2007        | 29,478                   |
| 2008        | 28,175                   |
| 2009        | 26,369                   |
| 2015        | 22,436                   |
| 2016        | 21,186                   |
